# Supplementary material for: Field assessments on impact of CO 2 concentration fluctuations along with complex terrain flows on the estimation of the net ecosystem exchange of temperate forests
Source: Copernicus journal article supplement (doi:10.5194/amt-2024-6), 2024-01-11
Supplement: Supplementary file 1 [file Table 1.xlsx]

## Sheet: Sheet1
Supplementary Table 1. Skew of Fs uncertainty during the growing season
Forests	τ	Long Pmax			Short Pmax
	(mins)	DT	NT	TP	DT	NT	TP
Mixed broadleaved forest	4	0.190***	-0.483***	-0.357***	-0.492***	-0.225***	-0.574***
	8	0.322***	-0.520***	-0.406***	-0.582***	-0.327***	-0.680***
	12	0.203***	-0.581***	-0.516***	-0.626***	-0.381***	-0.625***
	16	-0.004	-0.621***	-0.466***	-0.603***	-0.371***	-0.549***
	20	-0.170***	-0.667***	-0.453***	-0.605***	-0.299***	-0.463***
	24	-0.241***	-0.725***	-0.461***	-0.585***	-0.273***	-0.437***
	28	-0.264***	-0.748***	-0.455***	-0.604***	-0.290***	-0.417***
Mongolian oak forest	4	0.049	0.120**	-0.038	-0.495***	-0.628***	0.003
	8	0.026	0.113**	-0.007	-0.502***	-0.788***	-0.002
	12	0.028	0.071	0.004	-0.471***	-0.541***	-0.237***
	16	0.018	0.057	-0.015	-0.484***	-0.506***	-0.400***
	20	0.017	0.051	-0.004	-0.592***	-0.543***	-0.578***
	24	0.009	0.048	0.017	-0.719***	-0.533***	-0.699***
	28	-0.017	0.004	-0.009	-0.836***	-0.440***	-0.717***
Larch plantation forest	4	-0.580***	-1.029***	-0.387***	-2.158***	-2.201***	-0.163***
	8	-0.083	-0.780***	-0.619***	-2.143***	-2.000***	-0.460***
	12	0.05	-0.462***	-0.896***	-1.803***	-1.832***	-0.950***
	16	-0.075	-0.325***	-1.100***	-1.529***	-1.897***	-1.430***
	20	-0.331***	-0.317***	-1.376***	-1.363***	-1.819***	-1.583***
	24	-0.353***	-0.327***	-1.151***	-1.215***	-1.746***	-1.694***
	28	-0.251***	-0.347***	-1.221***	-1.170***	-1.564***	-1.800***
Note: τ represents the [CO2] averaging time window. DT represents daytime; NT represents nighttime; TP represents transition period. *** represents P < 0.001; ** represents P < 0.01; * represents P < 0.05.
