# Supplementary material for: Field assessments on impact of CO 2 concentration fluctuations along with complex terrain flows on the estimation of the net ecosystem exchange of temperate forests
Source: Copernicus journal article supplement (doi:10.5194/amt-2024-6), 2024-01-11
Supplement: Supplementary file 2 [file Table 2.xlsx]

## Sheet: Sheet1
Supplementary Table 2. Skew of Fs uncertainty during the dormant season
Forests	τ	Long Pmax			Short Pmax
	(mins)	DT	TP	NT	DT	TP	NT
Mixed broadleaved forest	4	0.980***	0.311***	-0.211***	-0.197***	0.317***	0.773***
	8	0.982***	0.170***	-0.138***	-0.368***	0.483***	0.792***
	12	0.978***	0.196***	-0.209***	-0.461***	0.523***	0.827***
	16	0.336***	0.219***	-0.387***	-0.535***	0.571***	0.777***
	20	-0.021	0.209***	-0.506***	-0.618***	0.586***	0.753***
	24	-0.099	0.192***	-0.768***	-0.806***	0.582***	0.700***
	28	-0.311***	0.161**	-0.949***	-1.058***	0.532***	0.657***
Mongolian oak forest	4	0.180***	-0.340***	0.956***	0.051	-0.06	0.177***
	8	0.290***	-0.385***	1.007***	0.058	-0.134**	0.237***
	12	0.334***	-0.372***	1.001***	0.062	-0.206***	0.230***
	16	0.341***	-0.347***	0.987***	0.058	-0.222***	0.204***
	20	0.375***	-0.316***	0.985***	0.077	-0.237***	0.182***
	24	0.417***	-0.266***	0.964***	0.102	-0.243***	0.185***
	28	0.444***	-0.226***	0.942***	0.124**	-0.252***	0.157***
Larch plantation forest	4	2.005***	0.266***	-0.122***	-0.055	-0.336***	1.259***
	8	1.905***	0.193**	-0.113***	-0.049	-0.382***	1.275***
	12	1.864***	0.180**	-0.104***	-0.031	-0.377***	1.231***
	16	1.829***	0.169**	-0.112***	0.007	-0.352***	1.216***
	20	1.864***	0.172**	-0.112***	0.022	-0.343***	1.234***
	24	1.835***	0.180**	-0.129***	0.029	-0.336***	1.245***
	28	1.806***	0.193**	-0.120***	0.013	-0.312***	1.243***
Note: τ represents the [CO2] averaging time window. DT represents daytime; NT represents nighttime; TP represents transition period. *** represents P < 0.001; ** represents P < 0.01; * represents P < 0.05.
