# Supplementary material for: Field assessments on impact of CO 2 concentration fluctuations along with complex terrain flows on the estimation of the net ecosystem exchange of temperate forests
Source: Copernicus journal article supplement (doi:10.5194/amt-2024-6), 2024-01-11
Supplement: Supplementary file 3 [file Table 3.xlsx]

## Sheet: Sheet1
Supplementary Table 3. kurtosis of Fs uncertainty during the growing season
Forests	τ	Long Pmax			Short Pmax
	(mins)	DT	TP	NT	DT	TP	NT
Mixed broadleaved forest	4	15.327***	9.153***	9.491***	23.319***	8.825***	9.668***
	8	16.872***	8.964***	9.705***	24.017***	9.304***	9.263***
	12	17.924***	8.738***	9.635***	22.297***	9.104***	8.805***
	16	18.639***	8.441***	9.574***	20.948***	9.034***	8.855***
	20	18.811***	7.963***	9.574***	20.009***	9.085***	8.928***
	24	17.657***	7.505***	9.701***	19.743***	9.370***	9.260***
	28	16.324***	7.226***	9.768***	19.862***	9.425***	9.485***
Mongolian oak forest	4	8.530***	11.376***	13.817***	14.071***	16.335***	22.168***
	8	8.342***	9.622***	12.921***	13.544***	15.364***	20.291***
	12	8.427***	8.223***	12.477***	13.157***	15.849***	16.858***
	16	7.975***	7.586***	12.185***	13.849***	16.751***	15.575***
	20	7.954***	7.360***	11.970***	15.325***	18.101***	15.545***
	24	8.006***	7.146***	12.216***	17.323***	19.061***	16.042***
	28	8.115***	6.850***	12.602***	19.660***	18.648***	15.325***
Larch plantation forest	4	22.906***	15.707***	14.752***	38.724***	19.910***	32.818***
	8	17.666***	12.636***	11.747***	42.751***	22.087***	26.084***
	12	18.215***	14.580***	9.920***	38.558***	24.093***	23.746***
	16	19.218***	16.940***	9.301***	35.369***	29.551***	25.192***
	20	19.349***	19.399***	9.109***	33.494***	29.309***	24.653***
	24	18.562***	16.757***	8.906***	29.358***	29.027***	24.405***
	28	17.457***	16.647***	8.583***	26.961***	28.165***	22.612***
Note: τ represents the [CO2] averaging time window. DT represents daytime; NT represents nighttime; TP represents transition period. *** represents P < 0.001; ** represents P < 0.01; * represents P < 0.05.
