# Supplementary material for: Field assessments on impact of CO 2 concentration fluctuations along with complex terrain flows on the estimation of the net ecosystem exchange of temperate forests
Source: Copernicus journal article supplement (doi:10.5194/amt-2024-6), 2024-01-11
Supplement: Supplementary file 4 [file Table 4.xlsx]

## Sheet: Sheet1
Supplementary Table 4. kurtosis of Fs uncertainty during the dormant season
Forests	τ	Long Pmax			Short Pmax
	(mins)	DT	TP	NT	DT	TP	NT
Mixed broadleaved forest	4	19.637***	9.707***	35.603***	25.764***	19.102***	22.589***
	8	21.297***	9.106***	30.567***	26.648***	20.134***	23.199***
	12	30.445***	8.903***	27.030***	26.026***	19.793***	23.782***
	16	28.506***	8.800***	30.702***	24.457***	18.720***	24.030***
	20	28.449***	8.531***	36.118***	23.641***	18.071***	23.933***
	24	29.949***	8.306***	52.732***	24.244***	17.914***	23.519***
	28	30.221***	8.076***	44.315***	25.397***	17.184***	22.948***
Mongolian oak forest	4	14.278***	9.303***	16.781***	10.578***	8.901***	17.393***
	8	14.822***	9.894***	17.522***	10.973***	8.873***	18.176***
	12	15.253***	9.877***	17.380***	11.093***	8.333***	18.085***
	16	15.353***	9.711***	17.258***	11.221***	8.181***	17.814***
	20	15.302***	9.535***	17.315***	11.164***	8.191***	17.541***
	24	15.124***	9.263***	16.953***	11.193***	8.250***	17.163***
	28	15.199***	8.985***	16.547***	11.102***	8.278***	16.699***
Larch plantation forest	4	24.751***	6.960***	9.357***	9.282***	8.269***	26.630***
	8	23.603***	6.976***	9.298***	9.704***	8.614***	27.330***
	12	22.895***	7.082***	9.303***	9.757***	8.568***	27.466***
	16	22.345***	7.087***	9.456***	9.466***	8.327***	27.500***
	20	22.365***	7.050***	9.390***	9.276***	8.323***	27.394***
	24	21.689***	6.945***	9.246***	9.271***	8.378***	26.977***
	28	21.101***	6.955***	9.052***	9.300***	8.309***	26.217***
Note: τ represents the [CO2] averaging time window. DT represents daytime; NT represents nighttime; TP represents transition period. *** represents P < 0.001; ** represents P < 0.01; * represents P < 0.05.
