# Supplementary material for: Field assessments on impact of CO 2 concentration fluctuations along with complex terrain flows on the estimation of the net ecosystem exchange of temperate forests
Source: Copernicus journal article supplement (doi:10.5194/amt-2024-6), 2024-01-11
Supplement: Supplementary file 5 [file Table 5.xlsx]

## Sheet: Sheet1
Supplementary Table 5. Summary of the linear regression coefficients of the Fs magnitudes – standard error relationships determined with σ(εs)=a+b|Fs| for the three forests, the two Pmax levels, and the seven average time windows during growing season
Forests	τ	Long Pmax			Short Pmax
	(mins)	a	b	R2	a	b	R2
Mixed broadleaved forest	4	3.684±0.236	0.199±0.016	0.867	3.652±0.248	0.215±0.017	0.874
	8	3.452±0.220	0.185±0.016	0.866	3.358±0.228	0.211±0.017	0.88
	12	3.229±0.212	0.183±0.016	0.864	3.175±0.220	0.203±0.017	0.879
	16	3.075±0.194	0.176±0.015	0.875	2.973±0.212	0.204±0.017	0.88
	20	2.889±0.186	0.177±0.016	0.877	2.897±0.203	0.193±0.017	0.877
	24	2.809±0.184	0.163±0.015	0.86	2.815±0.199	0.181±0.016	0.868
	28	2.605±0.181	0.172±0.017	0.868	2.671±0.198	0.177±0.017	0.856
Mongolian oak forest	4	2.570±0.145	0.165±0.012	0.909	2.429±0.191	0.215±0.018	0.896
	8	2.350±0.124	0.171±0.011	0.931	2.250±0.181	0.219±0.018	0.904
	12	2.190±0.118	0.177±0.012	0.935	2.203±0.185	0.206±0.019	0.887
	16	2.067±0.110	0.173±0.012	0.938	1.954±0.134	0.229±0.015	0.944
	20	1.926±0.096	0.184±0.011	0.954	1.899±0.139	0.220±0.016	0.936
	24	1.903±0.100	0.169±0.012	0.943	1.838±0.138	0.219±0.017	0.933
	28	1.865±0.109	0.155±0.013	0.92	1.792±0.141	0.207±0.017	0.922
Larch plantation forest	4	2.964±0.172	0.148±0.014	0.858	3.045±0.187	0.135±0.013	0.84
	8	2.879±0.188	0.126±0.015	0.782	2.769±0.149	0.132±0.011	0.877
	12	2.648±0.187	0.141±0.016	0.81	2.645±0.155	0.129±0.012	0.855
	16	2.629±0.207	0.131±0.018	0.748	2.434±0.132	0.139±0.011	0.898
	20	2.476±0.193	0.136±0.017	0.784	2.315±0.123	0.143±0.011	0.916
	24	2.354±0.168	0.135±0.016	0.825	2.196±0.123	0.151±0.011	0.917
	28	2.197±0.165	0.144±0.016	0.837	2.096±0.132	0.153±0.014	0.901
Note: τ represents the [CO2] averaging time window. DT represents daytime; NT represents nighttime; TP represents transition period. *** represents P < 0.001; ** represents P < 0.01; * represents P < 0.05.
