# Supplementary material for: Field assessments on impact of CO 2 concentration fluctuations along with complex terrain flows on the estimation of the net ecosystem exchange of temperate forests
Source: Copernicus journal article supplement (doi:10.5194/amt-2024-6), 2024-01-11
Supplement: Supplementary file 6 [file Table 6.xlsx]

## Sheet: Sheet1
Supplementary Table 6. Summary of the linear regression coefficients of the Fs magnitudes – standard error relationships determined with σ(εs)=a+b|Fs| for the three forests, the two Pmax levels, and the seven average time windows during dormant season
Forests	τ	Long Pmax			Short Pmax
	(mins)	a	b	R2	a	b	R2
Mixed broadleaved forest	4	1.240±0.028	0.076±0.005	0.967	1.172±0.049	0.081±0.012	0.898
	8	1.246±0.039	0.076±0.008	0.934	1.191±0.054	0.075±0.013	0.862
	12	1.218±0.041	0.077±0.008	0.929	1.168±0.044	0.077±0.011	0.908
	16	1.189±0.040	0.079±0.008	0.937	1.147±0.042	0.074±0.010	0.91
	20	1.169±0.043	0.080±0.008	0.928	1.126±0.043	0.075±0.011	0.905
	24	1.155±0.047	0.078±0.009	0.913	1.104±0.040	0.075±0.010	0.917
	28	1.137±0.044	0.076±0.008	0.919	1.081±0.034	0.076±0.008	0.943
Mongolian oak forest	4	1.316±0.052	0.056±0.009	0.827	1.181±0.041	0.076±0.010	0.916
	8	1.289±0.040	0.052±0.007	0.879	1.179±0.040	0.071±0.010	0.91
	12	1.269±0.042	0.051±0.007	0.863	1.158±0.034	0.070±0.008	0.933
	16	1.247±0.040	0.052±0.007	0.879	1.132±0.035	0.072±0.009	0.932
	20	1.223±0.039	0.053±0.007	0.886	1.108±0.031	0.071±0.008	0.942
	24	1.198±0.044	0.054±0.008	0.869	1.084±0.033	0.072±0.008	0.937
	28	1.136±0.040	0.065±0.009	0.905	1.049±0.031	0.079±0.009	0.954
Larch plantation forest	4	1.255±0.038	0.066±0.007	0.926	1.101±0.056	0.094±0.014	0.9
	8	1.260±0.040	0.060±0.007	0.908	1.106±0.062	0.084±0.016	0.854
	12	1.237±0.037	0.061±0.007	0.921	1.089±0.062	0.085±0.016	0.857
	16	1.223±0.034	0.060±0.006	0.931	1.087±0.059	0.080±0.015	0.855
	20	1.206±0.039	0.059±0.007	0.912	1.062±0.057	0.084±0.014	0.874
	24	1.187±0.037	0.059±0.007	0.918	1.026±0.058	0.091±0.021	0.868
	28	1.127±0.025	0.070±0.005	0.965	1.006±0.051	0.088±0.018	0.889
Note: τ represents the [CO2] averaging time window. DT represents daytime; NT represents nighttime; TP represents transition period. *** represents P < 0.001; ** represents P < 0.01; * represents P < 0.05.
