# Supplementary material for: Field assessments on impact of CO 2 concentration fluctuations along with complex terrain flows on the estimation of the net ecosystem exchange of temperate forests
Source: Copernicus journal article supplement (doi:10.5194/amt-2024-6), 2024-01-11
Supplement: Supplementary file [file amt-2024-6-AC1-supplement.pdf]

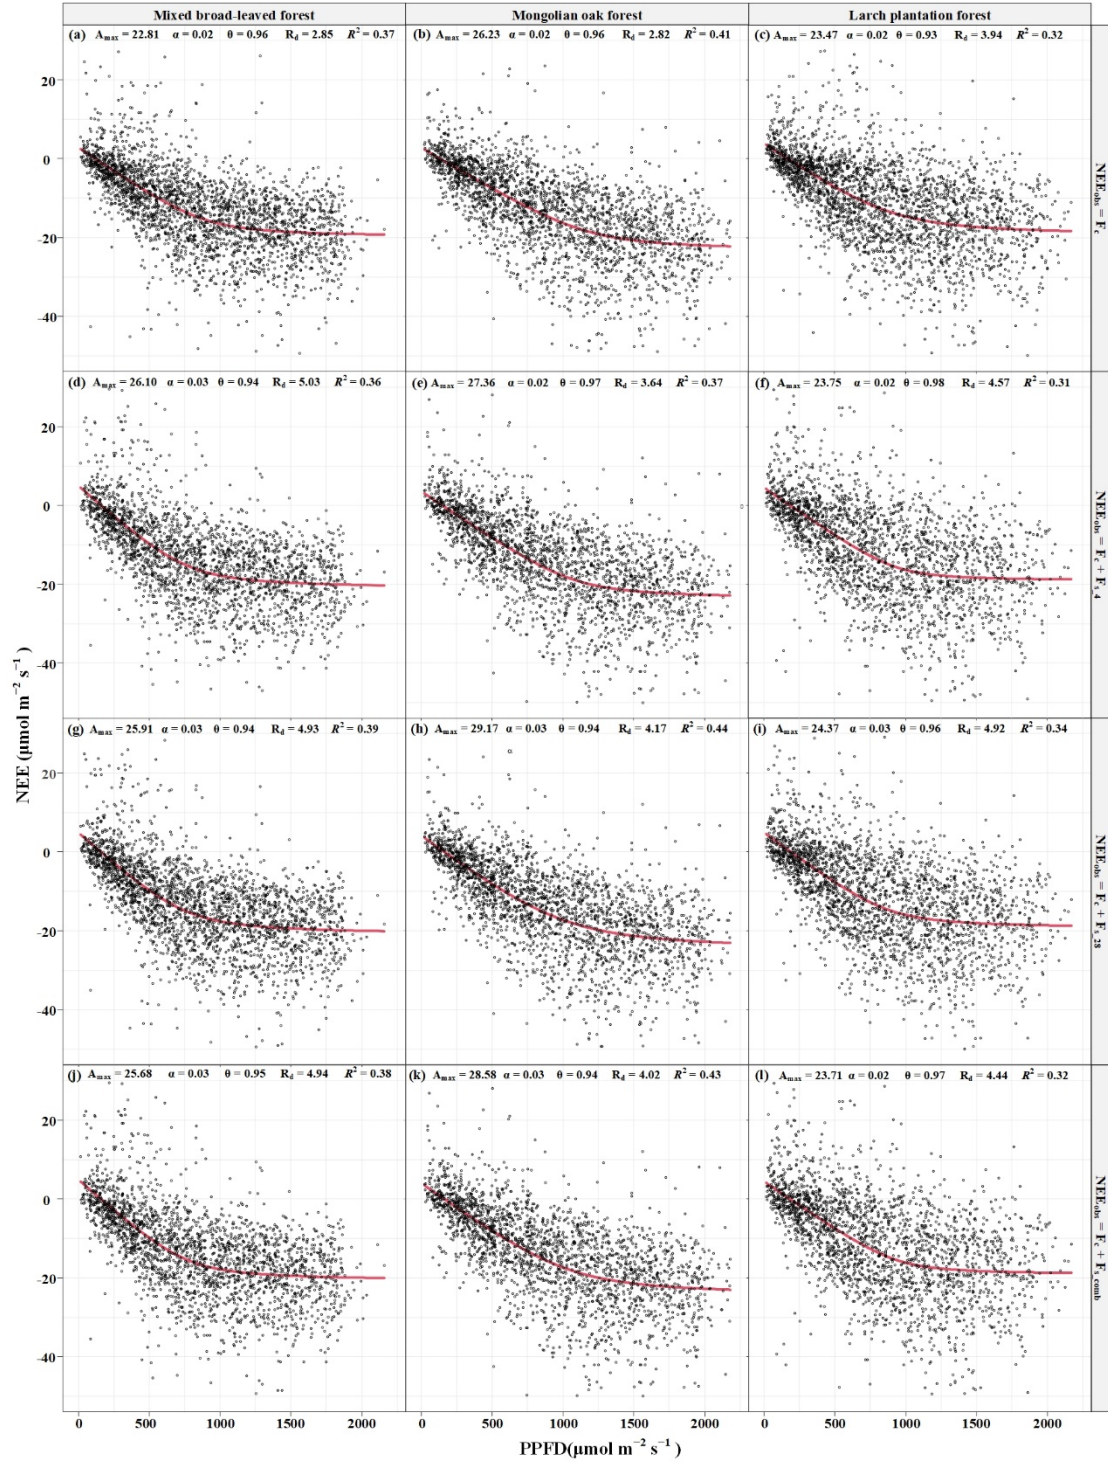

Figure S1 Response of daytime NEE observations (NEE<sub>obs</sub>) to photosynthetic photon flux density (PPFD) during July and August

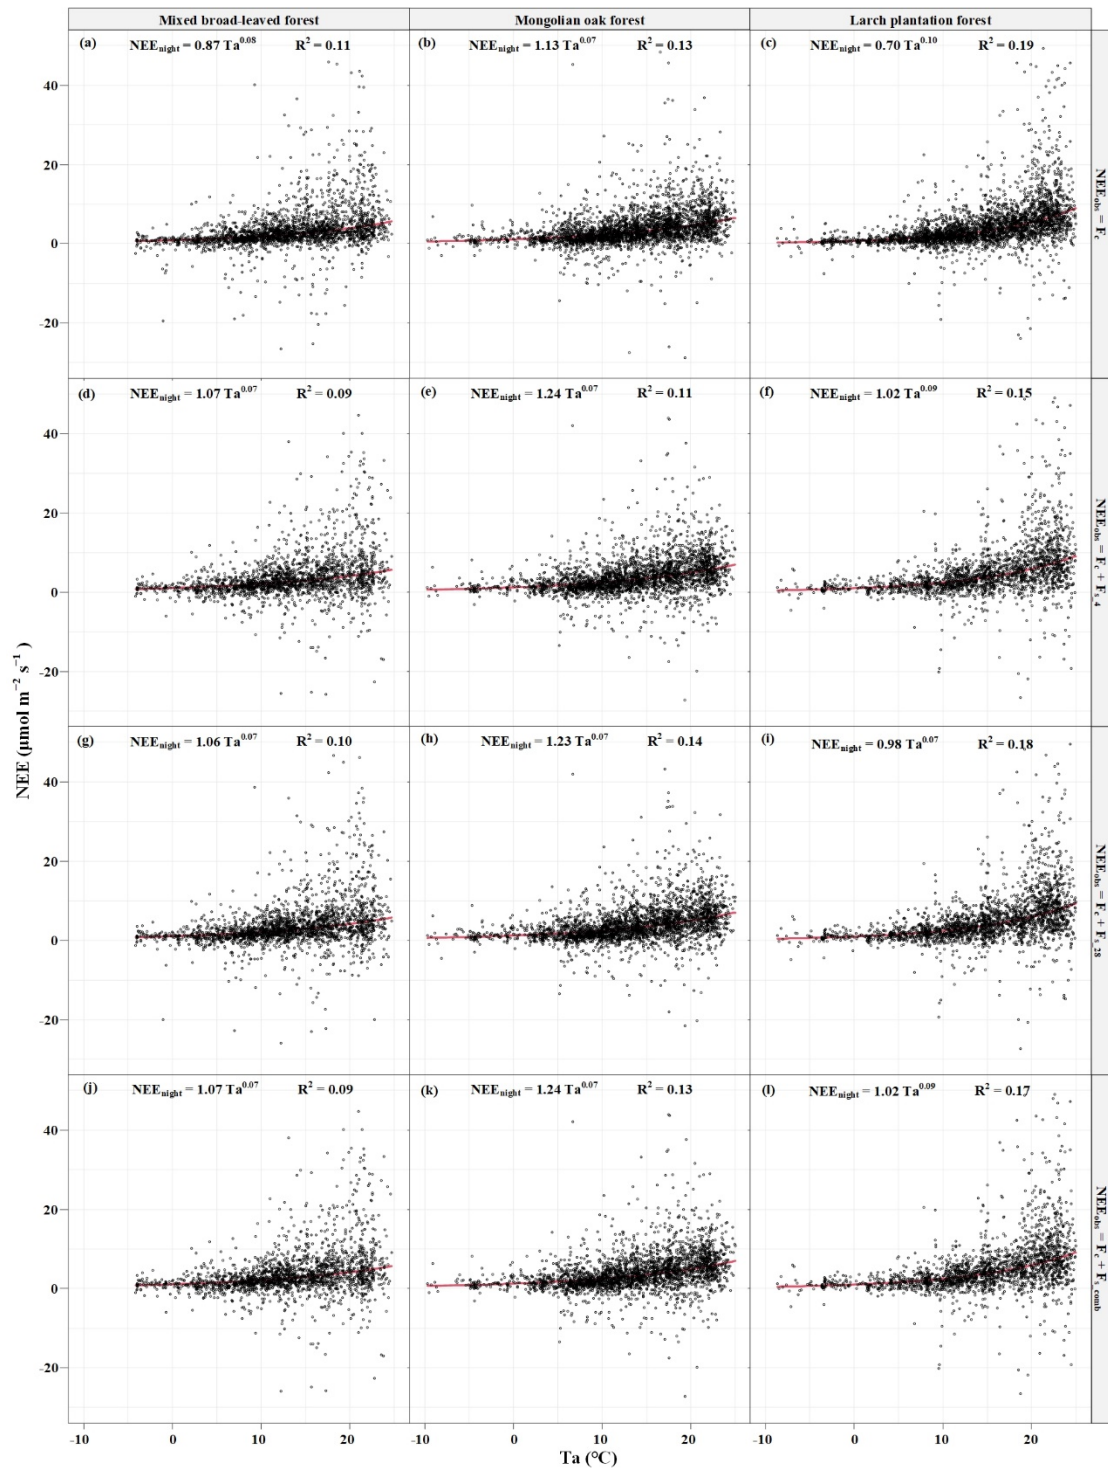

Figure S2 Response of nighttime NEE observations ( $NEE_{obs}$ ) to air temperature ( $T_a$ ) during the dormant season

The influences of  $F_s$  on the relationship between NEE observations and meteorological drivers, indicated the effect of uncertainty in  $F_s$  estimates on NEE observations. Our analysis showed that the correlations between NEE observations

derived from  $F_c + F_s$  and both photosynthetic photon flux density (PPFD) and air temperature are lower compared to those obtained from  $F_c$  alone (Figure 1 and Figure 2 in the Supplementary Materials). Additionally, the estimated light saturated net CO<sub>2</sub> assimilation ( $A_{max}$ ) is greater when NEE observations are estimated by  $F_s + F_c$ , as opposed to when NEE is estimated solely by  $F_c$ . This suggests that  $F_s$  significantly affects daytime NEE and can correct the estimation of  $A_{max}$  and related parameters. The relationship between NEE observations and PPFD is influenced by the size of averaging time window the  $F_s$  measurement. A larger averaging window results in less random uncertainty in the  $F_s$  estimation, thereby increasing the correlation between NEE observations and meteorological drivers, including PPFD and  $T_a$ .
