# Supplementary material for: Field assessments on impact of CO 2 concentration fluctuations along with complex terrain flows on the estimation of the net ecosystem exchange of temperate forests
Source: Copernicus journal article supplement (doi:10.5194/amt-2024-6), 2024-01-11
Supplement: Supplementary file [file amt-2024-6-AC2-supplement.pdf]

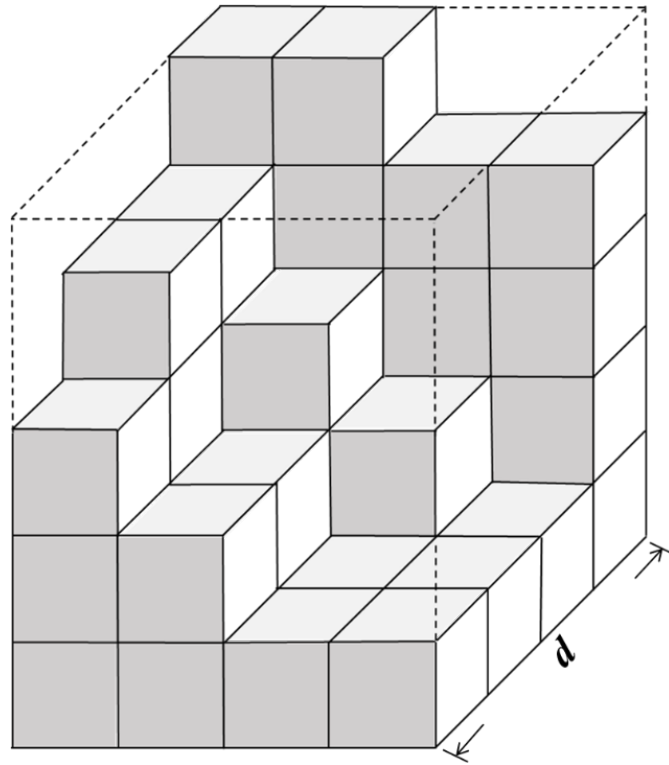

Fig. A3 Calculation the volume of terrain above the lowest elevation of an area unit ( $V_u$ ) and its largest vertically projected area ( $S_v$ ) utilizing 3-dimensional box counting.  $d$  is the edge length of the side of the area unit;  $V_u$  represents the cumulative volumes of the constituent cubes; and  $S_v$  indicates the total area of the shaded regions.  $P_d$  is calculated by the ratio of  $V_u$  to the product of  $S_v$  and  $d$ .
